1 Pervasive positive and negative feedback regulation of insulin-like signaling in *Caenorhabditis*  
2 *elegans*

3  
4 Colin S. Maxwell<sup>2#</sup>, Rebecca E. W. Kaplan<sup>1#</sup>, Nicole Kurhanewicz Codd<sup>3</sup> and L. Ryan Baugh<sup>1\*</sup>

5  
6 <sup>1</sup>Department of Biology, Duke University, Durham, North Carolina, United States of America

7 <sup>2</sup>Current address: Department of Biology, University of North Carolina at Chapel Hill, Chapel Hill,  
8 North Carolina, United States of America

9 <sup>3</sup>Current address: Department of Biology, University of Oregon, Eugene, Oregon, United States  
10 of America

11  
12 <sup>#</sup>These authors contributed equally to this work.

13  
14 Running title: Pervasive feedback in insulin signaling

15  
16 Total character count: ~58,000

17  
18 \*Corresponding author, L. Ryan Baugh

19 Department of Biology

20 Duke University

21 Box 90338

22 Durham, NC 27708-0338

23 Phone: 919-613-8179

24 E-mail: [ryan.baugh@duke.edu](mailto:ryan.baugh@duke.edu)

Maxwell, Kaplan *et al*

25 **Abstract** (175 words)

26

27 The *C. elegans* insulin-like signaling network supports homeostasis and developmental  
28 plasticity. The genome encodes 40 insulin-like peptides and one receptor. Feedback regulation  
29 has been reported, but the extent of feedback and its effect on signaling dynamics during a  
30 state transition has not been determined. We measured mRNA expression for each insulin-like  
31 peptide, the receptor *daf-2*, components of the PI3K pathway, and its transcriptional effectors  
32 *daf-16/FoxO* and *skn-1/Nrf* at high temporal resolution during transition from a starved,  
33 quiescent state to a fed, growing state in wild type and mutants affecting *daf-2/InsR* and *daf-*  
34 *16/FoxO*. We also analyzed the effect of temperature on insulin-like gene expression. We found  
35 that numerous PI3K pathway components and insulin-like peptides are affected by signaling  
36 activity, revealing pervasive positive and negative feedback regulation. Reporter gene analysis  
37 demonstrated that the *daf-2/InsR* agonist *daf-28* positively regulates its own expression and that  
38 other agonists cross-regulate *daf-28* transcription through feedback. Our results show that  
39 feedback regulation of insulin-like signaling is widespread, suggesting a critical role of feedback  
40 in signaling dynamics in this endocrine network and likely others.

41

42

Maxwell, Kaplan *et al*

## 43 **Introduction**

44           Insulin-like signaling maintains homeostasis by responding to fluctuations in nutrient  
45 availability and altering gene expression. Work in *C. elegans* has shown that insulin-like  
46 signaling also allows developmental plasticity. For example, insulin-like signaling regulates  
47 whether larvae become reproductive or arrest as dauer larvae, a developmental diapause that  
48 occurs in unfavorable conditions (Hu, 2007). Insulin-like signaling also contributes to continuous  
49 variations in phenotype, for example in regulation of aging and growth rate (Murphy and Hu,  
50 2013). However, it is unclear how signaling dynamics are regulated such that the pathway can  
51 maintain a phenotypic steady-state (homeostasis) or promote developmental plasticity,  
52 depending on conditions.

53           Insulin-like signaling is regulated by feedback in diverse animals. Pancreatic  $\beta$ -cell-  
54 specific insulin receptor-knockout mice are poor at glucose sensing, have a diminished insulin  
55 secretory response, and tend to develop age-dependent diabetes (Otani *et al*, 2004). In addition,  
56 the full effect of glucose on pancreatic  $\beta$ -cells grown *in vitro* requires the insulin receptor  
57 (Assmann *et al*, 2009). FoxO transcription factors, effectors of insulin signaling, activate  
58 transcription of insulin receptors in *Drosophila* and mammalian cells (Puig and Tjian, 2005),  
59 suggesting a relatively direct, cell-autonomous mechanism for feedback regulation. However,  
60 evidence for such direct feedback regulation has not been found in *C. elegans* (Kimura *et al*,  
61 2011).

62           Insulin-like signaling regulates the expression of insulin-like peptides in *C. elegans*,  
63 suggesting a relatively indirect, cell-nonautonomous mechanism for feedback regulation. The *C.*  
64 *elegans* genome encodes a family of 40 insulin-like peptides that can function as either agonists  
65 or antagonists of the sole insulin-like receptor *daf-2* (Pierce *et al*, 2001). Systematic analyses of  
66 insulin-like peptide expression and function suggest substantial functional specificity rather than  
67 global redundancy (Fernandes de Abreu *et al*, 2014; Ritter *et al*, 2013). *daf-2*/InsR signals

Maxwell, Kaplan *et al*

68 through a conserved phosphoinositide 3-kinase (PI3K) pathway to antagonize the FoxO  
69 transcription factor *daf-16* (Fig. 1A; Murphy and Hu, 2013). *daf-16*/FoxO represses transcription  
70 of the *daf-2* agonist *ins-7*, creating positive feedback (Murphy *et al*, 2003). This positive  
71 feedback results in "FoxO-to-FoxO" signaling, which has been proposed to coordinate the  
72 physiological state of different tissues in the animal (Alic *et al*, 2014; Murphy *et al*, 2007; Zhang  
73 *et al*, 2013). *daf-16* also activates transcription of the *daf-2* antagonist *ins-18*, again producing  
74 positive feedback (Matsunaga *et al*, 2012a; Murphy *et al*, 2003). Insulin-like peptide function has  
75 been reported to affect insulin-like peptide expression (Fernandes de Abreu *et al*, 2014; Ritter *et*  
76 *al*, 2013), consistent with feedback regulation. To the best of our knowledge, negative feedback  
77 regulation has not been reported, despite the fact that homeostasis generally relies on it  
78 (Cannon, 1929). Furthermore, the extent of feedback regulation, and whether it is positive or  
79 negative with respect to pathway activity, is unknown.

80 We sought to determine the extent of feedback regulation in insulin-like signaling in *C.*  
81 *elegans*. *C. elegans* larvae that hatch in the absence of food arrest development in the first  
82 larval stage ("L1 arrest" or "L1 diapause"), and insulin-like signaling regulates L1 arrest and  
83 development (Baugh, 2013). We performed a genetic analysis of gene expression, measuring  
84 expression of all 40 insulin-like peptides as well as components of the PI3K pathway in *daf-*  
85 *2*/InsR and *daf-16*/FoxO mutants, which have perturbed signaling activity. We analyzed larvae  
86 in L1 arrest and over time after feeding, as they transition from quiescence to growth. The  
87 rationale is that by identifying genes whose expression is affected by insulin-like signaling that  
88 themselves affect signaling activity we can infer feedback regulation. We report extensive  
89 feedback, both positive and negative, acting relatively directly at the level of the PI3K pathway  
90 and also indirectly via regulation of peptide expression. This work suggests that feedback  
91 regulation of insulin-like signaling is pervasive and that this feedback functions to stabilize  
92 signaling activity during constant conditions while allowing rapid responses to new conditions.

Maxwell, Kaplan *et al*

## 93 **Results**

### 94 *daf-2*/InsR acts through *daf-16*/FoxO to affect gene expression

95           We used the NanoString nCounter platform to measure expression of genes related to  
96 insulin-like signaling in fed and starved L1 larvae at high temporal resolution during the  
97 transition between developmental arrest and growth (Malkov *et al*, 2009). Total RNA was  
98 prepared from whole worms and hybridized to a codeset containing probes for all 40 insulin-like  
99 genes as well as components of the PI3K pathway and *sod-3*, a known DAF-16/FoxO target. In  
100 addition to wild type (WT), we analyzed mutations affecting *daf-2*/InsR and *daf-16*/FoxO to  
101 ascertain the effects of insulin-like signaling activity on expression. We used the reference allele  
102 of *daf-2*, e1370, as well as a stronger allele, e979 (Gems *et al*, 1998). We used a null allele of  
103 *daf-16*, mgDf47, as well as a *daf-16*(mgDf47); *daf-2*(e1370) double mutant to analyze epistasis.  
104 Mutations affecting *daf-2* are generally temperature sensitive, and insulin-like signaling  
105 responds to temperature. We therefore measured expression during L1 starvation at three  
106 different temperatures. We also fed bacteria to starved L1 larvae of each of the five genotypes  
107 and measured gene expression over time during recovery from arrest in a highly synchronous  
108 population (Fig. 1B). This experimental design enabled us to measure the effects of temperature,  
109 nutrient availability, and insulin-like signaling activity on genes related to insulin-like signaling  
110 itself during a critical physiological state transition.

111           *daf-16*/FoxO mediates the effects of *daf-2*/InsR on expression of genes involved in  
112 insulin-like signaling. *daf-16* is required for canonical effects of *daf-2*, such as dauer formation  
113 and lifespan extension (Hu, 2007; Murphy and Hu, 2013) . However, *daf-2* also acts through  
114 other effector genes of the PI3K pathway, such as *skn-1*/Nrf (Tullet *et al*, 2008), as well as other  
115 signaling pathways, such as RAS (Nanji *et al*, 2005). In addition, genome-wide expression  
116 analyses of *daf-16* have mostly been performed in a *daf-2* mutant background (*daf-2* vs. *daf-16*;  
117 *daf-2*) without analysis of WT and/or *daf-16* single mutants (Tepper *et al*, 2013), making  
118 analysis of epistasis between *daf-2* and *daf-16* with gene expression as a phenotype impossible.

Maxwell, Kaplan *et al*

119 Since epistasis was not analyzed, these studies could not determine whether *daf-16* mediated  
120 all of the effects of *daf-2* on gene expression or if other effectors made a significant contribution.  
121 A correlation matrix between genotypes over all conditions tested indicates that mutating *daf-2*  
122 affected expression, with a stronger effect of the e979 allele than e1370, as expected (Fig. 1C).  
123 *daf-16* also had a clear effect, and it was epistatic to *daf-2*. That is, the expression profile of the  
124 double mutant is similar to that of the *daf-16* single mutant but not *daf-2*. Statistical analysis of  
125 individual genes together with examination of expression patterns across genotypes  
126 corroborated the results of correlation analysis, failing to identify genes with significant effects of  
127 *daf-2* not mediated by *daf-16*. These results show that *daf-2* affects expression of genes  
128 involved in insulin-like signaling and that these effects are mediated exclusively by *daf-16*,  
129 consistent with feedback regulation.

130

### 131 *daf-16*/FoxO affects expression of multiple PI3K pathway genes

132 We analyzed expression of several components of the PI3K pathway, as well as *daf-*  
133 *2*/InsR and its transcriptional effectors *daf-16*/FoxO and *skn-1*/Nrf (Lin *et al*, 1997; Ogg *et al*,  
134 1997; Tullet *et al*, 2008). The known direct target of DAF-16, *sod-3*/SOD (Oh *et al*, 2006), was  
135 up-regulated in *daf-2* mutants and down-regulated in the *daf-16* mutant, with *daf-16* epistatic to  
136 *daf-2*, in both starved and fed larvae (Fig. 2, S1 and Table 1). The exemplary behavior of this  
137 positive control demonstrates the power of our experimental design. Notably, *daf-16* expression  
138 drops to background levels in the *daf-16* deletion mutant (Fig. 2 and S1), as expected. We  
139 previously reported that *daf-2* is up-regulated during L1 arrest (Chen and Baugh, 2014). We see  
140 here that *daf-2* is actually repressed by *daf-16* (Fig. 2 and S1). Given that *daf-2* is up-regulated  
141 during starvation, when *daf-16* is active, this result may be considered paradoxical. Our  
142 interpretation is that *daf-2* expression is independently regulated by nutrient availability and *daf-*  
143 *16* in opposing ways, illustrating regulatory complexity of the system. Nonetheless, since DAF-2  
144 antagonizes DAF-16 activity via the PI3K pathway, these results indicate positive feedback

Maxwell, Kaplan *et al*

145 between the sole insulin-like receptor and its FoxO transcriptional effector (Table 1). Likewise,  
146 *age-1*/PI3K, which transduces *daf-2* signaling activity, was repressed by *daf-16*, also suggesting  
147 positive feedback. However, *pdk-1*/PDK, *akt-1*/Akt and *akt-2*/Akt, downstream components of  
148 the PI3K pathway, were each activated by *daf-16*, albeit with relatively complex dynamics,  
149 suggesting negative feedback. Likewise, *daf-16* expression is reduced in *daf-2* mutants (Fig. 2),  
150 where its activity is increased, suggesting it represses its own transcription to produce negative  
151 feedback (Table 1). *skn-1*/Nrf expression was also reduced in *daf-2* mutants and increased in  
152 *daf-16* mutants, suggesting that insulin-like signaling positively regulates expression of both of  
153 its transcriptional effectors. Notably, the effects described here for each gene were consistent  
154 for fed and starved larvae (Fig. 2, S1 and Supp. Data File 2). In summary, insulin-like signaling  
155 acts through *daf-16*/FoxO to regulate multiple critical components of the pathway itself,  
156 consistent with a combination of positive and negative cell-autonomous feedback regulation.

157

#### 158 *daf-16*/FoxO affects expression of most insulin-like peptides

159 Insulin-like genes display complex dynamics in response to different levels of insulin-like  
160 signaling activity. Our codeset contained probes for all 40 insulin-like genes, and we reliably  
161 detected expression for 28 of them. Similar to what we saw with components of the PI3K  
162 pathway (Fig. 2, S1 and Table 1), *daf-16* appears to function as an activator in some cases and  
163 a repressor in others (Fig. 3, S2 and Table 1), but its function with respect to each gene affected  
164 was again consistent between fed and starved conditions (Fig. 3, S2 and Supp. Data File 2). For  
165 example, expression of *daf-28*, perhaps the most studied insulin-like peptide in *C. elegans*  
166 (Chen and Baugh, 2014; Cornils *et al*, 2011; Fernandes de Abreu *et al*, 2014; Hung *et al*, 2014;  
167 Li *et al*, 2003; Patel *et al*, 2008), was up-regulated in *daf-16* mutants and down-regulated in *daf-*  
168 *2* in starved and fed larvae (Fig. 3, S2 and Table 1), suggesting it is repressed by *daf-16*.  
169 Remarkably, all but three of the 28 reliably detected insulin-like genes were significantly affected  
170 by *daf-16* (Table 1). Mutation of *daf-16* caused up-regulation of twelve insulin-like genes and

Maxwell, Kaplan *et al*

171 down-regulation of thirteen, suggesting that *daf-16* directly or indirectly regulates transcription of  
172 most insulin-like genes.

173 Inference of feedback as positive or negative is complicated by the fact that individual  
174 insulin-like peptides function as either agonists or antagonists of *daf-2/InsR* (Pierce *et al*, 2001).  
175 Biochemical data and structural modeling suggest that function as an agonist or antagonist is a  
176 property of the peptide (Matsunaga *et al*, 2018), as opposed to the context in which it is  
177 expressed. To infer whether the net effect of feedback regulation is positive or negative with  
178 respect to insulin-like signaling activity (*daf-2/InsR* activity), we took into account whether *daf-16*  
179 appears to activate or repress the insulin-like gene and whether that gene encodes a putative  
180 agonist or antagonist. DAF-2 antagonizes DAF-16 activity, and so *daf-16* repression or  
181 activation of an agonist or antagonist, respectively, would hypothetically result in positive  
182 feedback. *daf-16* repression or activation of an antagonist or agonist, respectively, would  
183 hypothetically result in negative feedback. For example, *daf-28* was originally identified on the  
184 basis of its constitutive dauer-formation phenotype. *daf-28* is up-regulated in rich conditions and  
185 it promotes dauer bypass (reproductive development), similar to *daf-2/InsR*, consistent with  
186 function as an agonist of *daf-2* (Li *et al*, 2003). *daf-16* repression of *daf-28* expression therefore  
187 suggests positive feedback in this case (Table 1).

188 A number of studies have performed genetic analysis of insulin-like peptide function,  
189 determining whether individual insulin-like genes have similar or opposite loss-of-function  
190 phenotypes to *daf-2*, and thus whether they presumably function as agonists or antagonists,  
191 respectively (Chen and Baugh, 2014; Cornils *et al*, 2011; Fernandes de Abreu *et al*, 2014; Hung  
192 *et al*, 2014; Kawano *et al*, 2006; Li *et al*, 2003; Matsunaga *et al*, 2012a; Matsunaga *et al*, 2012b;  
193 Michaelson *et al*, 2010; Patel *et al*, 2008; Pierce *et al*, 2001). When we previously analyzed  
194 expression of insulin-like peptides in starved and fed L1 larvae, we found remarkable  
195 concordance between function (agonist or antagonist) and expression (positive or negative  
196 effect of food, respectively) (Chen and Baugh, 2014). Out of thirteen insulin-like peptides



Maxwell, Kaplan *et al*

197 consistently found to function as putative agonists or antagonists based on genetic analysis, we  
198 classified all thirteen the same way based on expression, while classifying eight additional  
199 peptides as well. This classification relied on separate time-series analyses of starved and fed  
200 larvae (Chen and Baugh, 2014), and inspection of the fed time series here did not reveal  
201 discrepancies between the two studies. We therefore included our previous putative functional  
202 classifications based on nutrient-dependent expression in Table 1, which tentatively assigns  
203 function to all but two of the 25 genes affected by *daf-16*. As explained above, putative agonists  
204 repressed by *daf-16*, like *daf-28*, hypothetically result in positive feedback, since *daf-2* signaling  
205 antagonizes *daf-16*. We identified seven genes like this in addition to *daf-28*. Conversely,  
206 activation of a putative antagonist should also produce positive feedback, which we infer in five  
207 cases, while activation of an agonist should produce negative feedback, which we infer in six  
208 cases. Finally, repression of a putative antagonist should produce negative feedback, which we  
209 infer in four cases. In summary, activation and repression of putative agonists and antagonists  
210 by *daf-16* is common, with positive and negative feedback hypothetically resulting from each  
211 different regulatory combination in multiple instances.

212

### 213 Temperature affects insulin-like gene expression

214 We analyzed expression of insulin-like genes at 15, 20 and 25°C during L1 starvation.  
215 *daf-2* mutants are generally temperature-sensitive (Gems *et al*, 1998), *daf-16* is localized to the  
216 nucleus at high temperatures (Henderson and Johnson, 2001), and *daf-2* mutants are heat-  
217 resistant (Munoz and Riddle, 2003). These observations suggest that insulin-like signaling  
218 responds to temperature. We hypothesized that temperature sensitivity results from  
219 temperature-dependent regulation of insulin-like peptide expression. Consistent with *daf-16*  
220 being active at elevated temperature, expression of its direct target *sod-3* was positively  
221 affected by temperature (Fig. S2 and Table S1). In support of our hypothesis, temperature  
222 affected mRNA expression of 21 out of 28 reliably detected insulin-like genes (Fig. S2 and

Maxwell, Kaplan *et al*

223 Table S1). *daf-28* expression was lower at higher temperatures, consistent with its role in  
224 promoting dauer bypass (Li *et al*, 2003), and confirmed in a recent publication (O'Donnell *et al*,  
225 2018). Expression of twelve insulin-like genes was lower at higher temperatures and nine were  
226 expressed higher at higher temperatures. However, there is no apparent correlation between  
227 putative function as agonist or antagonist and positive or negative regulation in response to  
228 higher temperature. Notably, although most insulin-like genes displayed significant temperature-  
229 dependent expression, the effect of temperature on expression was minor compared to nutrient  
230 availability.

231

### 232 Feedback mediates cross-regulation among insulin-like genes

233 Reporter gene analysis validated the effect of *daf-16*/FoxO on *daf-28* expression. We  
234 previously used quantitative RT-PCR to validate the nCounter approach to measuring insulin-  
235 like gene expression in *C. elegans* (Baugh *et al*, 2011), and we used transcriptional reporter  
236 genes to confirm positive regulation of several putative agonists in fed larvae, including *daf-28*  
237 (Chen and Baugh, 2014). A *Pdaf-28::GFP* transcriptional reporter gene again confirmed up-  
238 regulation in response to feeding (Fig 4A). Expression was evident but faint in anterior neurons  
239 and posterior intestine of starved L1 larvae, and it was brighter after being fed for 6 hr.  
240 Quantification of whole-animal fluorescence with the COPAS BioSorter provided robust  
241 statistical support for qualitative observations (Fig. 4B). Note that the statistics for this analysis  
242 were performed on the means of individual biological replicates, as opposed to each individual  
243 in a replicate. Thus, statistical significance is due to reproducibility despite relatively small effect  
244 sizes. Critically, expression appeared elevated in *daf-16* mutants compared to WT, in both  
245 starved and fed larvae (Fig. 4A). However, we did not observe a difference in the anatomical  
246 expression pattern in *daf-16* compared to WT. Quantification showed that the effect of *daf-16* is  
247 statistically significant (Fig. 4B). Notably, the effect of food was larger than that of *daf-16*, as  
248 expected based on nCounter results (Fig. 3). In addition, the effects of food and *daf-16* are

Maxwell, Kaplan *et al*

249 independent, suggesting that up-regulation of *daf-28* in response to feeding is not simply due to  
250 inhibition of *daf-16* leading to de-repression of *daf-28*. These results support the conclusion that  
251 *daf-16* represses *daf-28* transcription, consistent with feedback regulation.

252 Widespread feedback regulation of insulin-like signaling via transcriptional control of  
253 insulin-like peptides suggests that activity of individual insulin-like genes should affect  
254 expression of themselves and others. We analyzed expression of *Pdaf-28::GFP* in insulin  
255 mutants to test this hypothesis. *Pdaf-28::GFP* transgene expression was significantly reduced in  
256 a *daf-28* mutant (Fig. 4A,B). This result suggests that positive feedback mediated by *daf-16*  
257 repression of *daf-28*, *daf-28* agonism of *daf-2/InsR*, and *daf-2* inhibition of *daf-16* results in *daf-*  
258 *28* effectively promoting its own expression. *daf-28*, *ins-4* and *ins-6* coordinately regulate dauer  
259 entry and exit (Cornils *et al*, 2011), and they redundantly promote L1 development in response  
260 to feeding (Chen and Baugh, 2014). *ins-4*, 5 and 6 are in a chromosomal cluster, so we  
261 analyzed a deletion allele that removes all three (Hung *et al*, 2014). *Pdaf-28::GFP* expression  
262 was significantly reduced in fed larvae of the *ins-4, 5, 6* mutant compared to WT (Fig. 4A,B).  
263 This result suggests that feedback regulation results in cross-regulation among insulin-like  
264 peptides such that the function of one peptide affects the expression of others. Compound  
265 mutants affecting *ins-4, 5, 6* and *daf-28* grow slowly as fed L1 larvae and display starvation  
266 resistance during L1 arrest (Chen and Baugh, 2014), and *Pdaf-28::GFP* expression was also  
267 reduced consistent with these phenotypes (Fig. 4B). In summary, reporter gene analysis  
268 suggests physiological significance of feedback regulation, consistent with function of individual  
269 insulin-like peptides affecting expression of others.

270

## 271 **Discussion**

272 We determined the extent of feedback regulation of insulin-like signaling in *C. elegans* in  
273 starved and fed L1 larvae. We show that mRNA expression of nearly all detectable insulin-like  
274 genes is affected by insulin-like signaling activity, revealing pervasive feedback regulation. We

Maxwell, Kaplan *et al*

275 also show that several components of the PI3K pathway, including *daf-2*/InsR and *daf-16*/FoxO,  
276 are affected by signaling activity. Together these results suggest that feedback occurs inter- and  
277 intra-cellularly (Fig. 4C). Furthermore, we show that feedback is positive and negative at both  
278 levels of regulation. Finally, we demonstrate that feedback regulation results in auto- and cross-  
279 regulation of insulin-like gene expression.

280 We detected substantially more regulation of insulin-like genes by *daf-16*/FoxO than  
281 previously reported in genome-wide expression analyses. We also detected extensive effects of  
282 temperature on insulin-like gene expression. In contrast to other expression analyses, our  
283 analysis employed highly synchronous populations of larvae, improving sensitivity. Sensitivity  
284 was also likely improved by focusing on proximal effects of nutrient availability, which has robust  
285 effects on insulin-like signaling. In addition, the nCounter assay conditions used are optimized  
286 for sensitivity and precision (Baugh *et al*, 2011), improving power to detect differential  
287 expression. We also analyzed the effects of *daf-16* mutation in a WT background as well as a  
288 *daf-2* mutant background, in fed and starved larvae, producing four independent opportunities to  
289 detect an effect of *daf-16*. Finally, we sampled extensively, not only with biological replicates,  
290 but also with three different temperatures during L1 arrest as well as nine time points after  
291 feeding. Taken together, these features likely explain why we detected such extensive effects.

292 Other nutrient-dependent pathways also regulate expression of insulin-like genes and  
293 PI3K pathway components. That is, insulin-like signaling does not account for all of the  
294 observed effects of nutrient availability on gene expression (Fig. 4C). For example, we show  
295 that *daf-28* expression is up-regulated in response to feeding and that it is repressed by *daf-*  
296 *16*/FoxO. Since DAF-16 is nuclear and active during starvation and is excluded from the  
297 nucleus in response to feeding (Henderson and Johnson, 2001), it is conceivable that up-  
298 regulation of *daf-28* in response to feeding is due to inactivation of DAF-16 and de-repression of  
299 *daf-28*. However, this model predicts that *daf-28* expression should be equivalent in starved and  
300 fed *daf-16* mutant larvae, but it is not. To the contrary, induction of *daf-28* in fed larvae occurs

Maxwell, Kaplan *et al*

301 with similar magnitude in each genotype tested. This was true with mRNA expression analysis  
302 by nCounter as well as transcriptional reporter gene analysis. Despite numerous examples of  
303 *daf-2* and *daf-16* affecting expression, the effects of nutrient availability are generally evident in  
304 all genotypes, indicating the influence of other nutrient-dependent pathways (Fig. 4C).

305 We provide evidence that *daf-16*/FoxO activity leads to activation and repression of  
306 genes involved in insulin-like signaling. Both modes of regulation were observed for putative  
307 *daf-2*/InsR agonists and antagonists, supporting the conclusion agonists and antagonists both  
308 contribute to positive and negative feedback regulation. However, we used genetic and not  
309 biochemical analysis, so we do not know if DAF-16 regulation is direct or indirect. DAF-16 is  
310 thought to function primarily as an activator (Riedel *et al*, 2013; Schuster *et al*, 2010), with  
311 repression ("class II" targets) occurring indirectly via its antagonism of the transcriptional  
312 activator PQM-1 (Tepper *et al*, 2013). However, a role of *pqm-1* in L1 arrest and recovery has  
313 not been investigated. Nonetheless, *akt-1*/Akt, *akt-2*/Akt, *skn-1*/Nrf and *daf-16*/FoxO were each  
314 included on a list of 65 high-confidence direct DAF-16 targets (Schuster *et al*, 2010). We found  
315 each of these to be regulated by *daf-16*, with *skn-1* and *daf-16* being repressed, consistent with  
316 direct repression independent of PQM-1. Mechanistic details aside, this work reveals extensive  
317 positive and negative feedback regulation of insulin-like signaling.

318 Insulin-like peptide function regulates expression of insulin-like genes. We used reporter  
319 gene analysis to show that function of *daf-28*, a *daf-2* agonist repressed by *daf-16*, affects its  
320 own transcription. Furthermore, we showed that function of other agonists cross-regulate *daf-28*  
321 transcription. These results are consistent with reports of insulin-like peptides affecting  
322 expression of insulin-like genes (Fernandes de Abreu *et al*, 2014; Ritter *et al*, 2013), though in  
323 this case we demonstrate an intermediary effect of *daf-16*/FoxO. Given that we found most  
324 insulin-like genes to be regulated by insulin-like signaling, cross regulation among insulin-like  
325 peptides is likely common.

Maxwell, Kaplan *et al*

326           We believe the physiological significance of feedback regulation is to stabilize signaling  
327 activity in variable environments. Negative feedback supports homeostasis, returning the  
328 system to a stable steady state (Cannon, 1929). In contrast, positive feedback supports rapid  
329 responses and switch-like behavior (Ingolia and Murray, 2007). We speculate that by combining  
330 negative and positive feedback, the insulin-like signaling system is able to maintain homeostasis  
331 at different set points of signaling activity. That is, in constant conditions negative feedback  
332 stabilizes signaling activity, but when conditions change (e.g., differences in nutrient availability)  
333 positive feedback allows signaling activity to respond rapidly and negative feedback helps it  
334 settle to a new steady state rather than displaying runaway dynamics. In addition, signaling  
335 occurs in the context of a multicellular animal, with tissues and organs that presumably vary in  
336 their energetic and metabolic demands. Consequently, FoxO-to-FoxO signaling resulting from  
337 feedback may be relatively positive or negative in different anatomical regions, governed by the  
338 peptides involved, serving to coordinate the animal's physiology appropriately (Kaplan and  
339 Baugh, 2016; McMillen *et al*, 2002). In any case, the extent of feedback suggests that it is a very  
340 important means of regulation. We imagine that insulin-like signaling in other animals and other  
341 endocrine signaling systems are also rife with feedback, and that it is critical to system  
342 dynamics.

343

344

Maxwell, Kaplan *et al*

## 345 **Materials and Methods**

### 346 Nematode culture and sample collection

347           The following *C. elegans* strains were used for gene expression analysis on the  
348 NanoString nCounter platform: N2 (wild type), PS5150 (*daf-16(mgDf47)*), CB1370 (*daf-*  
349 *2(e1370)*), DR1942 (*daf-2(e979)*), GR1309 (*daf-16(mgDf47); daf-2(e1370)*). Strains were  
350 maintained on NGM agar plates with *E. coli* OP50 as food at 15°C (DR1942) or 20°C (all others).  
351 Liquid culture was used to obtain sufficiently large populations for time-series analysis with  
352 microgram-quantities of total RNA. Larvae were washed from clean, starved plates with S-  
353 complete and used to inoculate liquid cultures (Lewis, 1995). A single 6 cm plate was typically  
354 used, except with CB1370 and DR1942, for which two and three plates were used, respectively.  
355 Liquid cultures were comprised of S-complete and 40 mg/ml *E. coli* HB101. These cultures were  
356 incubated at 180 rpm and 15°C for four days (with the exception of DR1942, which was  
357 incubated for five days), and eggs were prepared by standard hypochlorite treatment, yielding in  
358 excess of 100,000 eggs each. These eggs were used to set up another liquid culture again  
359 consisting of S-complete and 40 mg/ml HB101 but with a defined density of 5,000 eggs/ml.  
360 These cultures were incubated at 180 rpm and 15°C for five days (N2, PS5150 and GR1309),  
361 six days (CB1370) or seven days (DR1942), and eggs were prepared by hypochlorite treatment  
362 with yields in excess of one million eggs per culture. These eggs were cultured in S-complete  
363 without food at a density of 5,000 eggs/ml at 180 rpm so they hatch and enter L1 arrest. For  
364 starved samples at 20°C and 25°C, they were cultured for 24 hr and collected, and for 15°C  
365 they were cultured for 48 hr. Fed samples were cultured for 24 hr at 20°C, and then 25 mg/ml  
366 HB101 was added to initiate recovery by feeding. Fed samples were collected at the time points  
367 indicated. Upon collection, larvae were quickly pelleted by spinning at 3,000 rpm for 10 sec,  
368 washed with S-basal and spun three times, transferred by Pasteur pipet to a 1.5 ml plastic tube  
369 in 100 µl or less, and flash frozen in liquid nitrogen. Samples were collected in at least two but



Maxwell, Kaplan *et al*

370 typically three independent biological replicates where the entire culture and collection process  
371 was repeated.

372

### 373 RNA preparation and hybridization

374 Total RNA was prepared using 1 ml TRIzol (Invitrogen) according to the manufacturer's  
375 instructions. 3 µg total RNA was used for hybridization by NanoString, Inc (Seattle, WA USA),  
376 as described (Chen and Baugh, 2014). The codeset used included the same probes for all  
377 insulin-like genes as in Chen, 2014 with the exception of *ins-13*, which was replaced here. The  
378 codeset also included probes for additional genes not included in Chen, 2014 (for a complete  
379 list of genes targeted see Supplementary Data File 1) as well as standard positive and negative  
380 control probes.

381

### 382 Data analysis

383 nCounter results were normalized in a two-step procedure. First, counts for positive  
384 control probes (for which transcripts were spiked into the hybridization at known copy numbers)  
385 were used to normalize the total number of counts across all samples. Second, the total number  
386 of counts for all targeted genes except *daf-16* (the deletion mutant used did not produce signal  
387 above background) was normalized across all samples. Insulin genes with a normalized count  
388 of less than 5,000 were excluded from further analysis because they displayed a cross-  
389 hybridization pattern indicating that they were not reliably detected. The complete normalized  
390 data set is available in Supplementary Data File 1.

391 Statistical analysis was used to assess the effects of *daf-16* (in fed and starved samples)  
392 and temperature (starved samples only). For the effect of *daf-16* in fed samples, two tests were  
393 used: a non-parametric ANCOVA with the null hypothesis that loess lines connecting the points  
394 of the *daf-16* single mutant (or the *daf-16; daf-2* double mutant) and wild type (or *daf-2(e1370)*)  
395 are overlapping. This test was implemented using the R package "sm" (Bowman and Azzalini,



Maxwell, Kaplan *et al*

396 1997). For the effect of *daf-16* in starved samples, two tests were used: a bootstrap test was  
397 used with the null hypothesis that the *daf-16* single mutant (or the *daf-16; daf-2* double mutant)  
398 has the same mean expression level as wild type (or *daf-2(e1370)*) for all temperatures. The  
399 effect size of genotype is calculated within each temperature, so it controls for temperature.  
400 10,000 permutations of genotype were calculated to get the p-value. For the effect of  
401 temperature during starvation, a chi-squared goodness of fit test was used to ask whether  
402 temperature explained additional variance in gene expression after controlling for genotype.  
403 Benjamini-Hochberg was used to calculate the 'q-value' (Benjamini and Hochberg, 1995), and  
404 these q-values were used to identify genes affected by *daf-16* or temperature at a false-  
405 discovery rate of 5%. The complete results of statistical analysis is available in Supplementary  
406 Data File 2.

407

#### 408 Reporter gene analysis

409 The *mgIs40 [P<sub>daf-28</sub>::GFP]* reporter (Li *et al*, 2003) was analyzed using the following  
410 genetic backgrounds: wild type (N2), *daf-16(mu86)*, *daf-28(tm2308)* and *ins-4, 5, 6(hpDf761)*.  
411 Strains were maintained on NGM agar plates with *E. coli* OP50 as food at 20°C. Eggs were  
412 prepared by standard hypochlorite treatment. These eggs were used to set up a liquid culture  
413 consisting of S-basal without ethanol or cholesterol with a defined density of 1,000 eggs/ml.  
414 After 18 hours to allow for hatching, *E. coli* HB101 was added at 25 mg/ml to the fed samples. 6  
415 hours post food addition, the samples were washed three times with 10 ml S-basal and then run  
416 through the COPAS BioSorter measuring GFP fluorescence. Analysis of the COPAS data was  
417 performed in R. Tukey fences were used to remove outliers. Data points were also removed if  
418 they were determined to be debris by size or lack of fluorescent signal. This cleanup left a total  
419 of almost 165,000 data points. Fluorescence data was normalized by worm density. The Bartlett  
420 test of homogeneity of variances rejected the null hypothesis that the samples had equal  
421 variance. Therefore, unpaired t-tests with unequal variance were used to determine the

Maxwell, Kaplan *et al*

422 significance of condition and genotype on mean normalized fluorescence. There were three  
423 biological replicates for the insulin-like peptide mutants and seven biological replicates for wild  
424 type and *daf-16* mutants.

425 For imaging, the samples were prepared in the same way then paralyzed with 3.75 mM  
426 sodium azide and placed on an agarose pad on a microscope slide. Images were taken on a  
427 compound fluorescent microscope.

428

#### 429 Data Availability

430 The complete normalized data set is available in Supplementary Data File 1. Complete  
431 results of statistical analysis is available in Supplementary Data File 2. Raw data and strains  
432 used here are available upon request.

433

#### 434 **Acknowledgements**

435 We would like to thank NanoString, Inc. for performing nCounter hybridizations for us.  
436 Some strains were provided by the CGC, which is funded by NIH Office of Research  
437 Infrastructure Programs (P40 OD010440). The National Science Foundation (IOS-1120206) and  
438 the National Institutes of Health (R01GM117408) funded this work.

439

#### 440 **Author Contributions**

441 LRB conceived of the study and provided funding. LRB, REWK and NKC performed the  
442 experiments. CSM and REWK analyzed the data. LRB, CSM and REWK prepared the  
443 manuscript.

444

#### 445 **Conflict of Interest**

446 The authors have no conflicts of interest to declare.

Maxwell, Kaplan *et al*

## 447 **References**

- 448 Alic N, Tullet JM, Niccoli T, Broughton S, Hoddinott MP, Slack C, Gems D, Partridge L. Cell-  
449 nonautonomous effects of dFOXO/DAF-16 in aging. *Cell reports*. 2014;6(4):608-16. doi:  
450 10.1016/j.celrep.2014.01.015. PubMed PMID: 24508462; PMCID: PMC3969275.
- 451 Assmann A, Ueki K, Winnay JN, Kadowaki T, Kulkarni RN. Glucose effects on beta-cell growth  
452 and survival require activation of insulin receptors and insulin receptor substrate 2. *Mol*  
453 *Cell Biol*. 2009;29(11):3219-28. doi: 10.1128/MCB.01489-08. PubMed PMID: 19273608;  
454 PMCID: PMC2682019.
- 455 Baugh LR. To Grow or Not to Grow: Nutritional Control of Development During *Caenorhabditis*  
456 *elegans* L1 Arrest. *Genetics*. 2013;194(3):539-55. Epub 2013/07/05. doi:  
457 10.1534/genetics.113.150847. PubMed PMID: 23824969.
- 458 Baugh LR, Kurhanewicz N, Sternberg PW. Sensitive and precise quantification of insulin-like  
459 mRNA expression in *Caenorhabditis elegans*. *PloS one*. 2011;6(3):e18086. Epub  
460 2011/03/30. doi: 10.1371/journal.pone.0018086. PubMed PMID: 21445366; PMCID:  
461 3062572.
- 462 Benjamini Y, Hochberg Y. Controlling the false discovery rate: a practical and powerful  
463 approach to multiple testing. *Journal of the Royal Statistical Society Series B*.  
464 1995;57(1):289-300.
- 465 Bowman AW, Azzalini A. Applied smoothing techniques for data analysis : the kernel approach  
466 with S-Plus illustrations. R package 'sm': nonparametric smoothing methods (version  
467 2.2-5.4). Oxford  
468 New York: Clarendon Press ;  
469 Oxford University Press; 1997. xi, 193 p. p.
- 470 Cannon WB. Organization for physiological homeostasis. *Physiological Reviews*.  
471 1929;IX(3):399-431.
- 472 Chen Y, Baugh LR. Ins-4 and daf-28 function redundantly to regulate *C. elegans* L1 arrest.  
473 *Developmental biology*. 2014;394(2):314-26. doi: 10.1016/j.ydbio.2014.08.002. PubMed  
474 PMID: 25128585.
- 475 Cornils A, Gloeck M, Chen Z, Zhang Y, Alcedo J. Specific insulin-like peptides encode sensory  
476 information to regulate distinct developmental processes. *Development*.  
477 2011;138(6):1183-93. Epub 2011/02/24. doi: 138/6/1183 [pii]  
478 10.1242/dev.060905. PubMed PMID: 21343369; PMCID: 3042873.
- 479 Fernandes de Abreu DA, Caballero A, Fardel P, Stroustrup N, Chen Z, Lee K, Keyes WD, Nash  
480 ZM, Lopez-Moyado IF, Vaggi F, Cornils A, Regenass M, Neagu A, Ostojic I, Liu C, Cho  
481 Y, Sifoglu D, Shen Y, Fontana W, Lu H, Csikasz-Nagy A, Murphy CT, Antebi A, Blanc E,  
482 Apfeld J, Zhang Y, Alcedo J, Ch'ng Q. An insulin-to-insulin regulatory network  
483 orchestrates phenotypic specificity in development and physiology. *PLoS genetics*.  
484 2014;10(3):e1004225. Epub 2014/03/29. doi: 10.1371/journal.pgen.1004225. PubMed  
485 PMID: 24675767; PMCID: 3967928.
- 486 Gems D, Sutton AJ, Sundermeyer ML, Albert PS, King KV, Edgley ML, Larsen PL, Riddle DL.  
487 Two pleiotropic classes of daf-2 mutation affect larval arrest, adult behavior,  
488 reproduction and longevity in *Caenorhabditis elegans*. *Genetics*. 1998;150(1):129-55.  
489 PubMed PMID: 9725835; PMCID: PMC1460297.
- 490 Henderson ST, Johnson TE. daf-16 integrates developmental and environmental inputs to  
491 mediate aging in the nematode *Caenorhabditis elegans*. *Curr Biol*. 2001;11(24):1975-80.  
492 PubMed PMID: 11747825.
- 493 Hu PJ. Dauer. *WormBook*. 2007:1-19. Epub 2007/11/09. doi: 10.1895/wormbook.1.144.1.  
494 PubMed PMID: 17988074.
- 495 Hung WL, Wang Y, Chitturi J, Zhen M. A *Caenorhabditis elegans* developmental decision  
496 requires insulin signaling-mediated neuron-intestine communication. *Development*.

Maxwell, Kaplan *et al*

- 497 2014;141(8):1767-79. Epub 2014/03/29. doi: 10.1242/dev.103846. PubMed PMID:  
498 24671950; PMCID: 3978837.
- 499 Ingolia NT, Murray AW. Positive-feedback loops as a flexible biological module. *Curr Biol*.  
500 2007;17(8):668-77. doi: 10.1016/j.cub.2007.03.016. PubMed PMID: 17398098; PMCID:  
501 PMC1914375.
- 502 Kaplan RE, Baugh LR. L1 arrest, daf-16/FoxO and nonautonomous control of post-embryonic  
503 development. *Worm*. 2016;5(2):e1175196. doi: 10.1080/21624054.2016.1175196.  
504 PubMed PMID: 27383290; PMCID: PMC4911975.
- 505 Kawano T, Nagatomo R, Kimura Y, Gengyo-Ando K, Mitani S. Disruption of ins-11, a  
506 *Caenorhabditis elegans* insulin-like gene, and phenotypic analyses of the gene-disrupted  
507 animal. *Bioscience, biotechnology, and biochemistry*. 2006;70(12):3084-7. doi:  
508 10.1271/bbb.60472. PubMed PMID: 17151440.
- 509 Kimura KD, Riddle DL, Ruvkun G. The *C. elegans* DAF-2 insulin-like receptor is abundantly  
510 expressed in the nervous system and regulated by nutritional status. *Cold Spring Harbor*  
511 *symposia on quantitative biology*. 2011;76:113-20. Epub 2011/11/30. doi:  
512 10.1101/sqb.2011.76.010660. PubMed PMID: 22123849.
- 513 Lewis JA, and Fleming, John T. Basic Culture Methods. In: Epstein HF, and Shakes, D. C.,  
514 editor. *Caenorhabditis elegans: Modern biological analysis of an organism*. San Diego:  
515 Academic Press; 1995. p. 4-27.
- 516 Li W, Kennedy SG, Ruvkun G. daf-28 encodes a *C. elegans* insulin superfamily member that is  
517 regulated by environmental cues and acts in the DAF-2 signaling pathway. *Genes Dev*.  
518 2003;17(7):844-58. Epub 2003/03/26. doi: 10.1101/gad.1066503. PubMed PMID:  
519 12654727; PMCID: 196030.
- 520 Lin K, Dorman JB, Rodan A, Kenyon C. daf-16: An HNF-3/forkhead family member that can  
521 function to double the life-span of *Caenorhabditis elegans*. *Science*.  
522 1997;278(5341):1319-22. Epub 1997/11/21. PubMed PMID: 9360933.
- 523 Malkov VA, Serikawa KA, Balantac N, Watters J, Geiss G, Mashadi-Hosseini A, Fare T.  
524 Multiplexed measurements of gene signatures in different analytes using the Nanostring  
525 nCounter Assay System. *BMC Res Notes*. 2009;2:80. doi: 10.1186/1756-0500-2-80.  
526 PubMed PMID: 19426535; PMCID: PMC2688518.
- 527 Matsunaga Y, Gengyo-Ando K, Mitani S, Iwasaki T, Kawano T. Physiological function,  
528 expression pattern, and transcriptional regulation of a *Caenorhabditis elegans* insulin-  
529 like peptide, INS-18. *Biochemical and biophysical research communications*.  
530 2012a;423(3):478-83. Epub 2012/06/12. doi: 10.1016/j.bbrc.2012.05.145. PubMed  
531 PMID: 22683638.
- 532 Matsunaga Y, Matsukawa T, Iwasaki T, Nagata K, Kawano T. Comparison of physiological  
533 functions of antagonistic insulin-like peptides, INS-23 and INS-18, in *Caenorhabditis*  
534 *elegans*. *Bioscience, biotechnology, and biochemistry*. 2018;82(1):90-6. doi:  
535 10.1080/09168451.2017.1415749. PubMed PMID: 29303423.
- 536 Matsunaga Y, Nakajima K, Gengyo-Ando K, Mitani S, Iwasaki T, Kawano T. A *Caenorhabditis*  
537 *elegans* insulin-like peptide, INS-17: its physiological function and expression pattern.  
538 *Bioscience, biotechnology, and biochemistry*. 2012b;76(11):2168-72. Epub 2012/11/08.  
539 PubMed PMID: 23132577.
- 540 McMillen D, Kopell N, Hasty J, Collins JJ. Synchronizing genetic relaxation oscillators by  
541 intercell signaling. *Proceedings of the National Academy of Sciences of the United*  
542 *States of America*. 2002;99(2):679-84. doi: 10.1073/pnas.022642299. PubMed PMID:  
543 11805323; PMCID: PMC117365.
- 544 Michaelson D, Korta DZ, Capua Y, Hubbard EJ. Insulin signaling promotes germline  
545 proliferation in *C. elegans*. *Development*. 2010;137(4):671-80. Epub 2010/01/30. doi:  
546 10.1242/dev.042523. PubMed PMID: 20110332; PMCID: 2827619.

Maxwell, Kaplan *et al*

- 547 Munoz MJ, Riddle DL. Positive selection of *Caenorhabditis elegans* mutants with increased  
548 stress resistance and longevity. *Genetics*. 2003;163(1):171-80. Epub 2003/02/15.  
549 PubMed PMID: 12586705; PMCID: 1462431.
- 550 Murphy CT, Hu PJ. Insulin/insulin-like growth factor signaling in *C. elegans*. *WormBook*. 2013:1-  
551 43. doi: 10.1895/wormbook.1.164.1. PubMed PMID: 24395814; PMCID: PMC4780952.
- 552 Murphy CT, Lee SJ, Kenyon C. Tissue entrainment by feedback regulation of insulin gene  
553 expression in the endoderm of *Caenorhabditis elegans*. *Proceedings of the National*  
554 *Academy of Sciences of the United States of America*. 2007;104(48):19046-50. Epub  
555 2007/11/21. doi: 10.1073/pnas.0709613104. PubMed PMID: 18025456; PMCID:  
556 2141905.
- 557 Murphy CT, McCarroll SA, Bargmann CI, Fraser A, Kamath RS, Ahringer J, Li H, Kenyon C.  
558 Genes that act downstream of DAF-16 to influence the lifespan of *Caenorhabditis*  
559 *elegans*. *Nature*. 2003;424(6946):277-83. Epub 2003/07/08. doi: 10.1038/nature01789.  
560 PubMed PMID: 12845331.
- 561 Nanji M, Hopper NA, Gems D. LET-60 RAS modulates effects of insulin/IGF-1 signaling on  
562 development and aging in *Caenorhabditis elegans*. *Aging cell*. 2005;4(5):235-45. doi:  
563 10.1111/j.1474-9726.2005.00166.x. PubMed PMID: 16164423.
- 564 O'Donnell MP, Chao PH, Kammenga JE, Sengupta P. Rictor/TORC2 mediates gut-to-brain  
565 signaling in the regulation of phenotypic plasticity in *C. elegans*. *PLoS genetics*.  
566 2018;14(2):e1007213. doi: 10.1371/journal.pgen.1007213. PubMed PMID: 29415022;  
567 PMCID: PMC5819832.
- 568 Ogg S, Paradis S, Gottlieb S, Patterson GI, Lee L, Tissenbaum HA, Ruvkun G. The Fork head  
569 transcription factor DAF-16 transduces insulin-like metabolic and longevity signals in *C.*  
570 *elegans*. *Nature*. 1997;389(6654):994-9. Epub 1997/11/14. doi: 10.1038/40194. PubMed  
571 PMID: 9353126.
- 572 Oh SW, Mukhopadhyay A, Dixit BL, Raha T, Green MR, Tissenbaum HA. Identification of direct  
573 DAF-16 targets controlling longevity, metabolism and diapause by chromatin  
574 immunoprecipitation. *Nature genetics*. 2006;38(2):251-7. Epub 2005/12/29. doi:  
575 10.1038/ng1723. PubMed PMID: 16380712.
- 576 Otani K, Kulkarni RN, Baldwin AC, Krutzfeldt J, Ueki K, Stoffel M, Kahn CR, Polonsky KS.  
577 Reduced beta-cell mass and altered glucose sensing impair insulin-secretory function in  
578 *beta1*ARKO mice. *Am J Physiol Endocrinol Metab*. 2004;286(1):E41-9. doi:  
579 10.1152/ajpendo.00533.2001. PubMed PMID: 14519599.
- 580 Patel DS, Fang LL, Svy DK, Ruvkun G, Li W. Genetic identification of HSD-1, a conserved  
581 steroidogenic enzyme that directs larval development in *Caenorhabditis elegans*.  
582 *Development*. 2008;135(13):2239-49. Epub 2008/05/23. doi: 10.1242/dev.016972.  
583 PubMed PMID: 18495818.
- 584 Pierce SB, Costa M, Wisotzkey R, Devadhar S, Homburger SA, Buchman AR, Ferguson KC,  
585 Heller J, Platt DM, Pasquinelli AA, Liu LX, Doberstein SK, Ruvkun G. Regulation of DAF-  
586 2 receptor signaling by human insulin and *ins-1*, a member of the unusually large and  
587 diverse *C. elegans* insulin gene family. *Genes Dev*. 2001;15(6):672-86. Epub  
588 2001/03/29. doi: 10.1101/gad.867301. PubMed PMID: 11274053; PMCID: 312654.
- 589 Puig O, Tjian R. Transcriptional feedback control of insulin receptor by dFOXO/FOXO1. *Genes*  
590 *Dev*. 2005;19(20):2435-46. Epub 2005/10/19. doi: 10.1101/gad.1340505. PubMed  
591 PMID: 16230533; PMCID: 1257398.
- 592 Riedel CG, Downen RH, Lourenco GF, Kirienko NV, Heimbucher T, West JA, Bowman SK,  
593 Kingston RE, Dillin A, Asara JM, Ruvkun G. DAF-16 employs the chromatin remodeller  
594 SWI/SNF to promote stress resistance and longevity. *Nat Cell Biol*. 2013;15(5):491-501.  
595 doi: 10.1038/ncb2720. PubMed PMID: 23604319; PMCID: PMC3748955.
- 596 Ritter AD, Shen Y, Fuxman Bass J, Jeyaraj S, Deplancke B, Mukhopadhyay A, Xu J, Driscoll M,  
597 Tissenbaum HA, Walhout AJ. Complex expression dynamics and robustness in *C.*

Maxwell, Kaplan *et al*

- 598 elegans insulin networks. *Genome research*. 2013;23(6):954-65. Epub 2013/03/30. doi:  
599 10.1101/gr.150466.112. PubMed PMID: 23539137; PMCID: 3668363.
- 600 Schuster E, McElwee JJ, Tullet JM, Doonan R, Matthijssens F, Reece-Hoyes JS, Hope IA,  
601 Vanfleteren JR, Thornton JM, Gems D. DamID in *C. elegans* reveals longevity-  
602 associated targets of DAF-16/FoxO. *Mol Syst Biol*. 2010;6:399. doi:  
603 10.1038/msb.2010.54. PubMed PMID: 20706209; PMCID: PMC2950082.
- 604 Tepper RG, Ashraf J, Kaletsky R, Kleemann G, Murphy CT, Bussemaker HJ. PQM-1  
605 complements DAF-16 as a key transcriptional regulator of DAF-2-mediated development  
606 and longevity. *Cell*. 2013;154(3):676-90. Epub 2013/08/06. doi:  
607 10.1016/j.cell.2013.07.006. PubMed PMID: 23911329; PMCID: 3763726.
- 608 Tullet JM, Hertweck M, An JH, Baker J, Hwang JY, Liu S, Oliveira RP, Baumeister R, Blackwell  
609 TK. Direct inhibition of the longevity-promoting factor SKN-1 by insulin-like signaling in *C.*  
610 *elegans*. *Cell*. 2008;132(6):1025-38. Epub 2008/03/25. doi: 10.1016/j.cell.2008.01.030.  
611 PubMed PMID: 18358814; PMCID: 2367249.
- 612 Zhang P, Judy M, Lee SJ, Kenyon C. Direct and indirect gene regulation by a life-extending  
613 FOXO protein in *C. elegans*: roles for GATA factors and lipid gene regulators. *Cell*  
614 *metabolism*. 2013;17(1):85-100. doi: 10.1016/j.cmet.2012.12.013. PubMed PMID:  
615 23312285; PMCID: PMC3969420.
- 616

617



Maxwell, Kaplan *et al*

618 **Figure Legends**

619

620 Figure 1. *daf-16*/FoxO is epistatic to *daf-2*/InsR for expression of genes involved in insulin-like  
621 signaling. A) A diagram of the *C. elegans* insulin-like signaling pathway. B) A schematic of the  
622 experimental design with times and conditions sampled indicated. C) A symmetric matrix of  
623 correlation coefficients for pairs of genotypes is presented as a heat map, with scale bar.  
624 Examination of individual gene expression patterns confirmed that *daf-16* is epistatic to *daf-2* in  
625 each instance without exception.

626

627 Figure 2. Insulin-like signaling regulates expression of genes comprising the insulin-like  
628 signaling pathway. Transcript abundance (arbitrary units) is plotted over time during recovery  
629 from L1 starvation by feeding in five different genotypes with various levels of insulin-like  
630 signaling activity. In addition to *daf-2*/InsR and components of the PI3K pathway, the  
631 transcriptional effectors of signaling, *daf-16*/FoxO and *skn-1*/Nrf, are plotted as well as the  
632 known DAF-16 target *sod-3*. Note that *daf-16* expression was not detected in *daf-16* mutants.  
633 Each gene plotted was significantly affected by *daf-16* (see Tables 1, S1 and supp. data). Error  
634 bars reflect the SEM of two or three biological replicates.

635

636 Figure 3. Insulin-like signaling regulates expression of the majority of insulin-like peptides.  
637 Transcript abundance (arbitrary units) is plotted over time during recovery from L1 starvation by  
638 feeding in five different genotypes with various levels of insulin-like signaling activity. Of 28  
639 reliably detected insulin-like genes, 25 were significantly affected by *daf-16* (all but *ins-2*, *-10*  
640 and *-34*; see Tables 1, S1 and supp. data) and are plotted. Error bars reflect the SEM of two or  
641 three biological replicates.

642

Maxwell, Kaplan *et al*

643 Figure 4. Insulin-like peptide function affects expression of insulin-like peptides. A)  
644 Representative images of a *Pdaf-28::GFP* transcriptional reporter gene are presented for WT,  
645 *daf-16(mu86)*, *daf-28(tm2308)* and *ins-4, 5, 6(hpDf761)* in starved and fed (6 hr) L1 larvae, as  
646 indicated. Images were cropped and expression in anterior neurons and posterior gut is shown.  
647 B) Quantitative analysis of *Pdaf-28::GFP* expression using the COPAS BioSorter is presented.  
648 The grand average and standard deviation of three to seven biological replicates is plotted for  
649 starved (0 hr) and fed (6 hr) L1 larvae. \* $p < 0.05$ , \*\*\* $p < 0.001$  (unpaired t-test on replicate means,  
650  $n = 3$  to 7). C) Pervasive feedback regulation of insulin-like signaling. *daf-2/InsR* antagonizes *daf-*  
651 *16/FoxO* via the PI3K pathway. *daf-16* activates expression of three pathway components to  
652 produce negative feedback, and it represses expression of two components to produce positive  
653 feedback. *daf-16* also appears to activate its own expression, producing positive feedback. *daf-*  
654 *16* represses expression of eight putative insulin-like peptide agonists of *daf-2* and activates five  
655 putative antagonists, producing positive feedback in each case. *daf-16* also activates six  
656 putative agonists and represses four putative antagonists, producing negative feedback. Food  
657 activates expression of agonists and represses expression of antagonists, independent of *daf-*  
658 *16* and insulin-like signaling. Dashed arrows reflect putative function of insulin-like peptides as  
659 agonists or antagonists of *daf-2*, reflecting cell-nonautonomous effects of *daf-16*. Inferred  
660 positive feedback is depicted in green and negative feedback in red. Numbers next to colored  
661 arrows indicate the number of genes represented by each arrow.

662

663 Figure S1 - complementing Fig. 2. Insulin-like signaling regulates expression of genes  
664 comprising the insulin-like signaling pathway during L1 starvation. Transcript abundance  
665 (arbitrary units) is plotted during L1 starvation at three different temperatures in five different  
666 genotypes with various levels of insulin-like signaling activity. In addition to *daf-2/InsR* and  
667 components of the PI3K pathway, the transcriptional effectors of signaling, *daf-16/FoxO* and  
668 *skn-1/Nrf*, are plotted as well as the known DAF-16 target *sod-3*. Note that *daf-16* expression



Maxwell, Kaplan *et al*

669 was not detected in *daf-16* mutants. Each gene plotted was significantly affected by *daf-16* (see  
670 Tables 1, S1 and supp. data). Error bars reflect the SEM of two or three biological replicates.

671  
672 Figure S2 - complementing Fig. 3. Insulin-like signaling and temperature regulate expression of  
673 the majority of insulin-like peptides during L1 starvation. Transcript abundance (arbitrary units)  
674 is plotted during L1 starvation at three different temperatures in five different genotypes with  
675 various levels of insulin-like signaling activity. Of 28 reliably detected insulin-like genes, 25 were  
676 significantly affected by *daf-16* and are plotted. 21 were significantly affected by temperature (all  
677 but *ins-2*, 9, 12, 16, 21, 29, 34). *ins-10* was affected by temperature but not *daf-16* and is not  
678 plotted here (see Tables 1, S1 and supp. data). Error bars reflect the SEM of two or three  
679 biological replicates.

680  
681 Supp Data File 1. Complete normalized expression data set. Raw data is available upon request.

682  
683 Supp Data File 2. Complete statistics for regulation of all genes during starvation and recovery  
684 by *daf-16* and temperature.

685

Figure 1

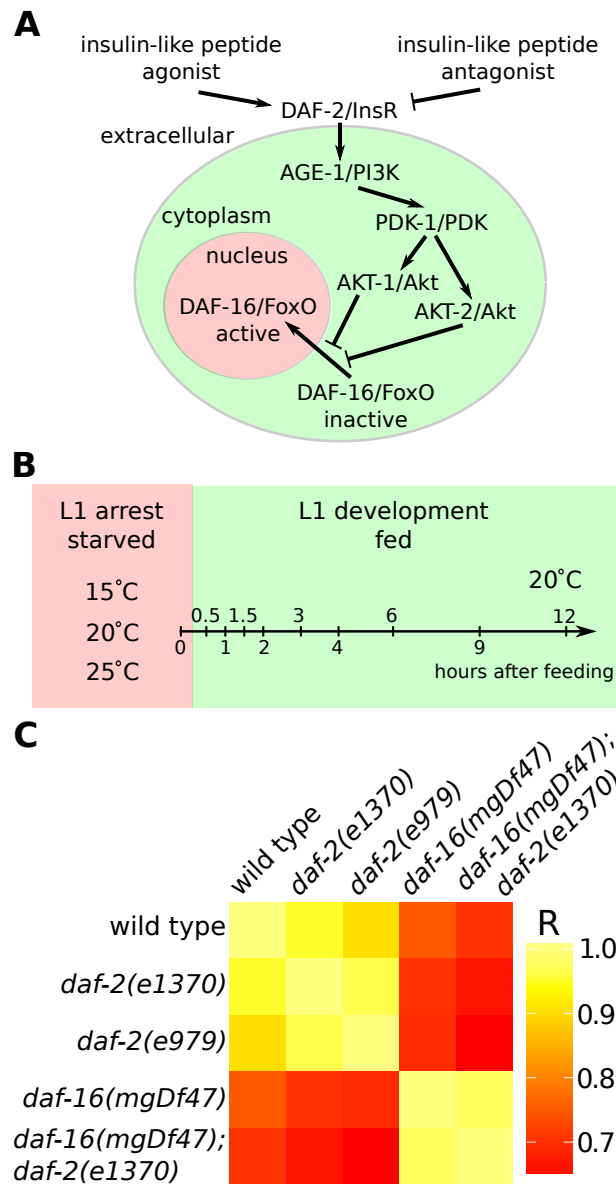

Figure 2

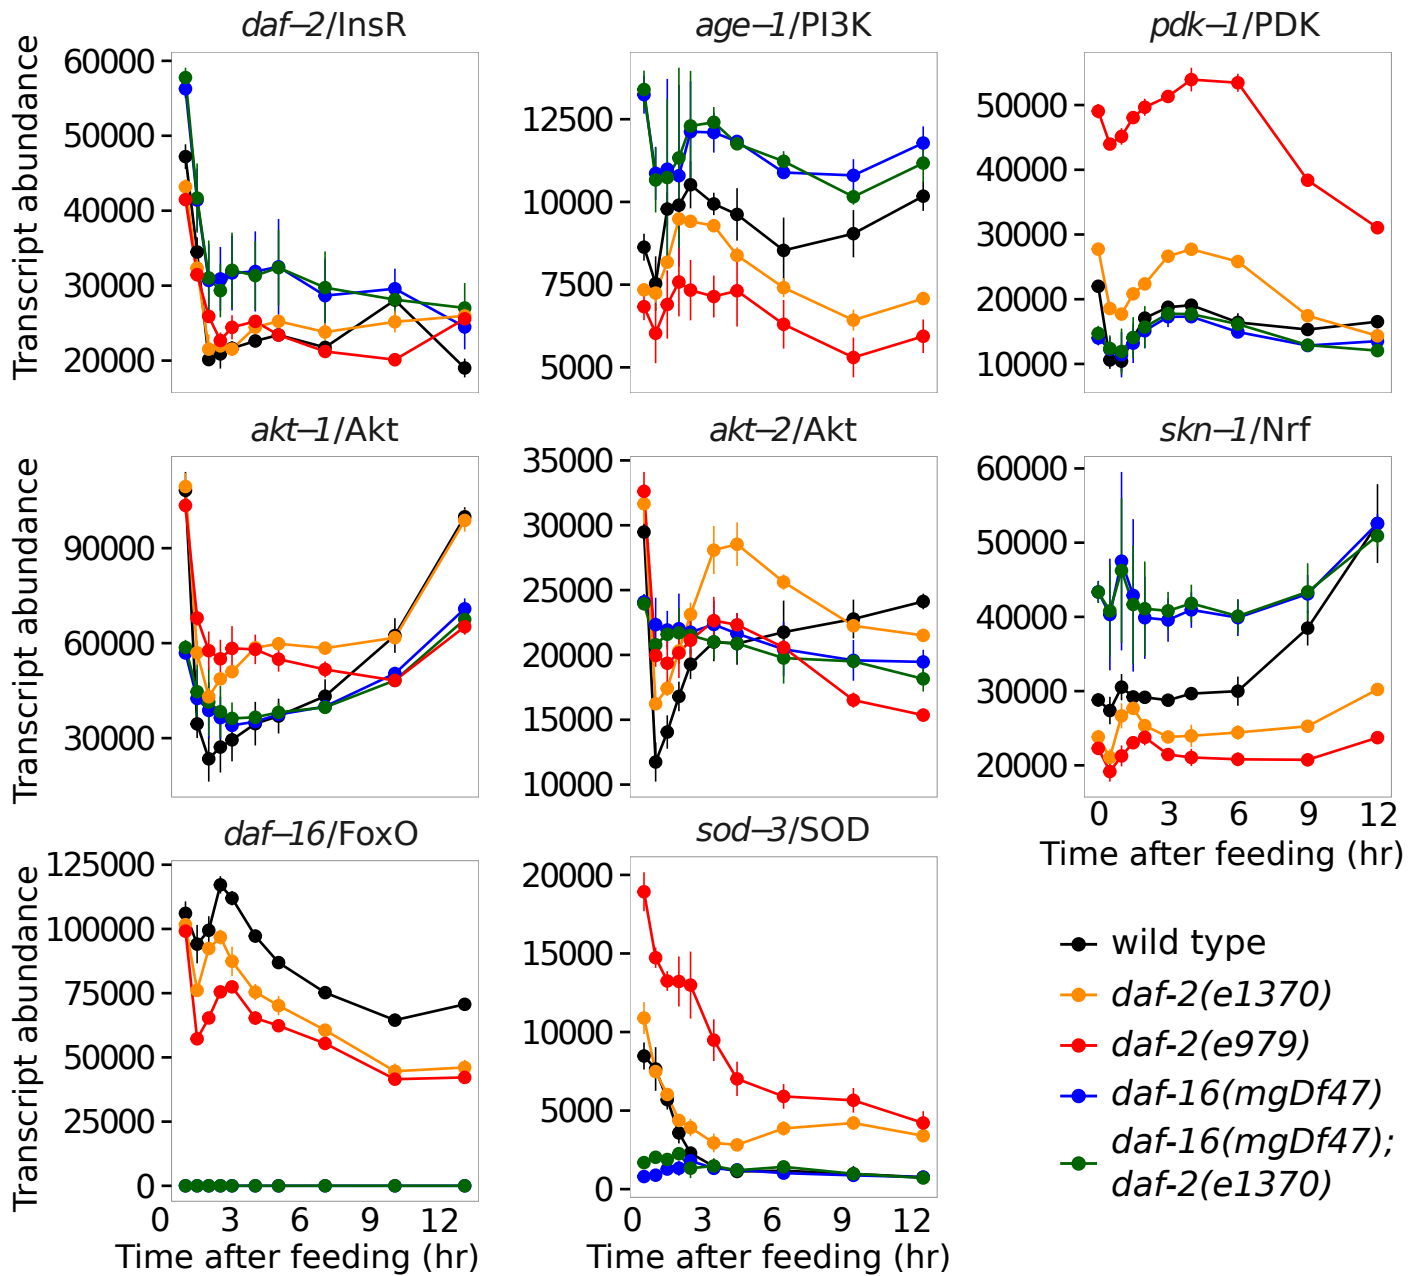

Figure 3

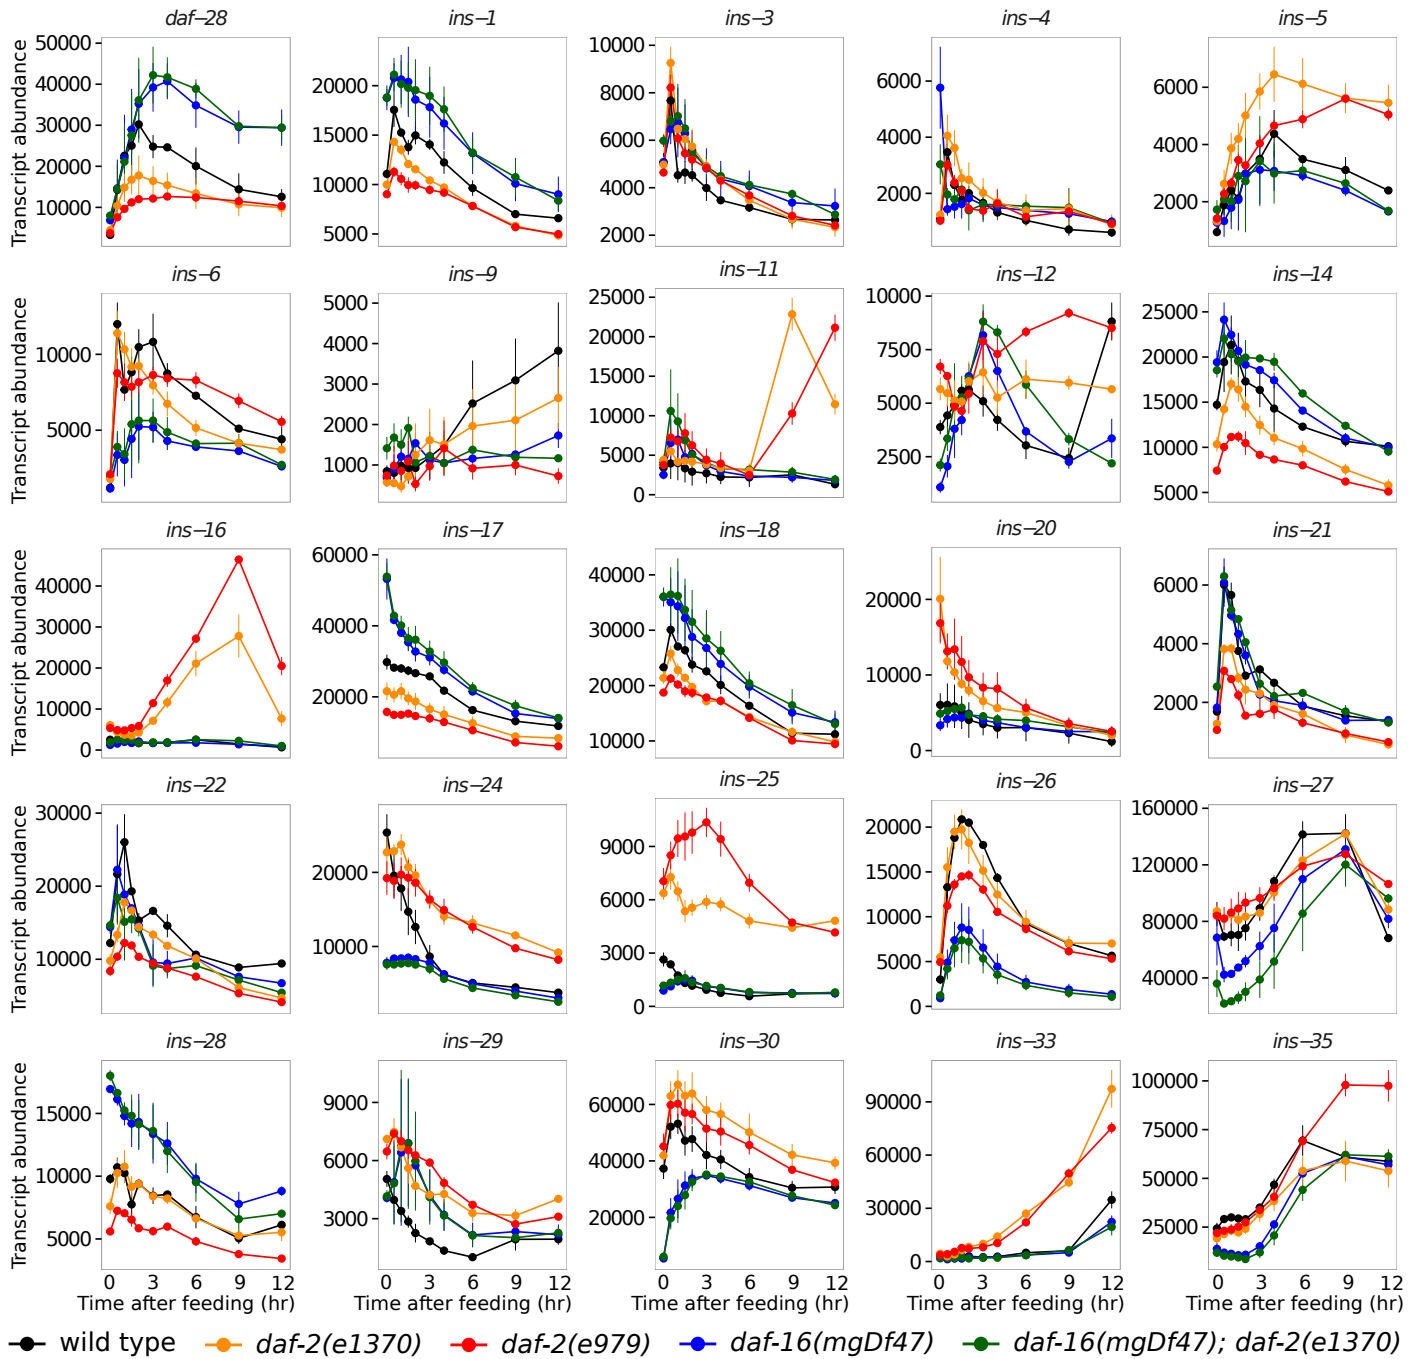

## Figure 4

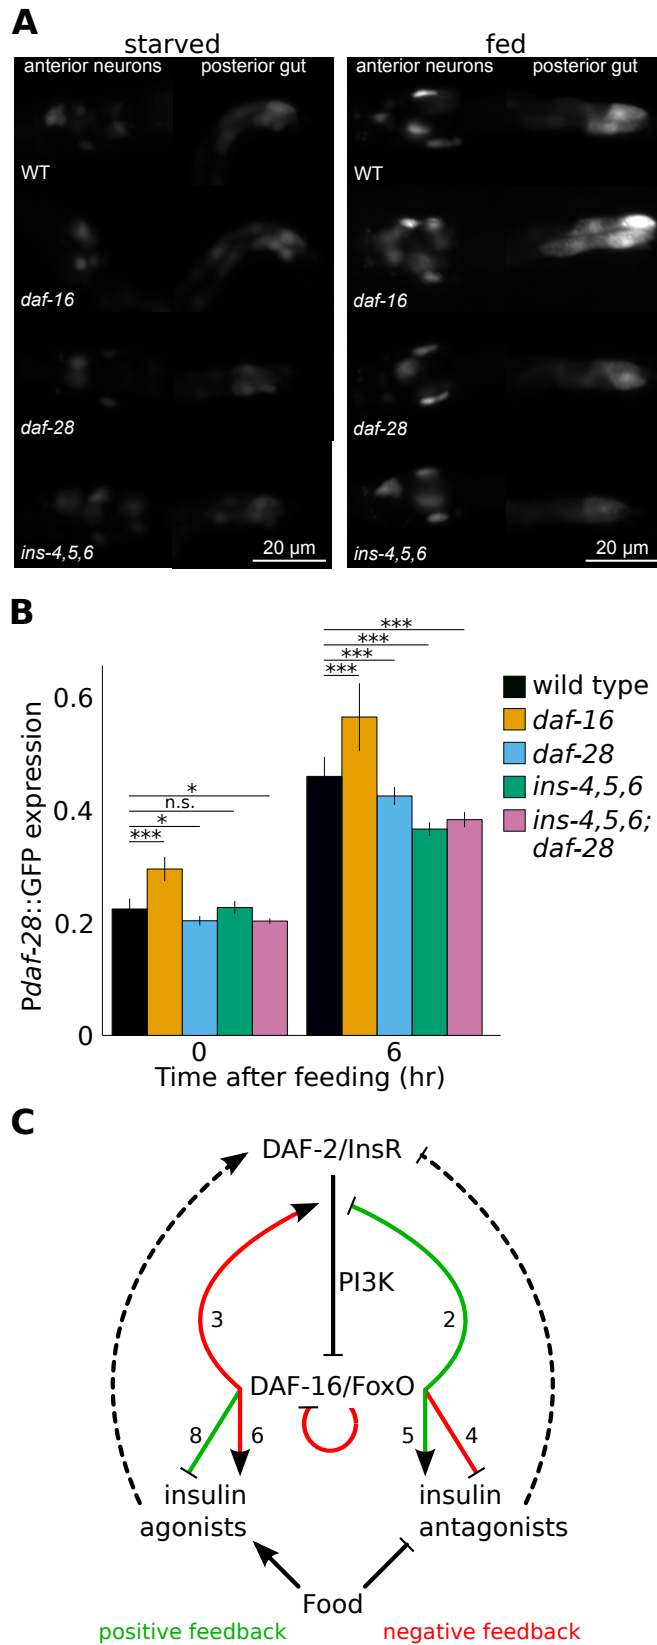

Figure S1

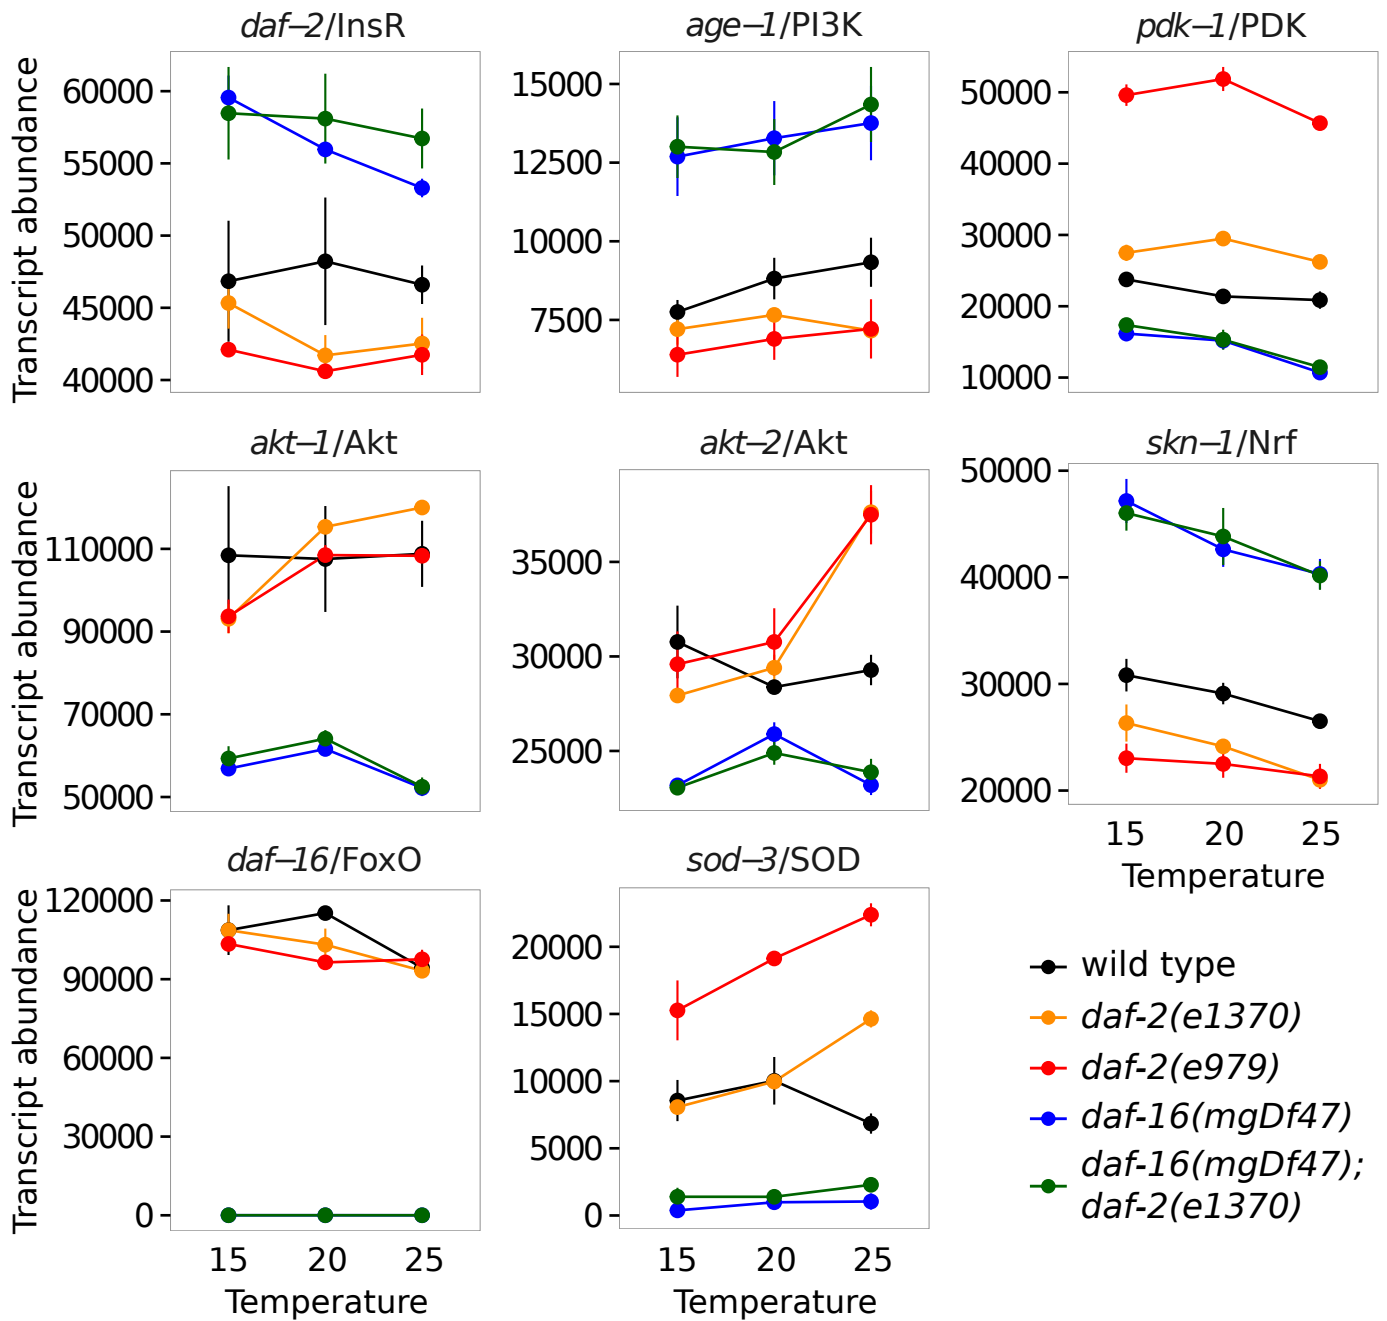

Figure S2

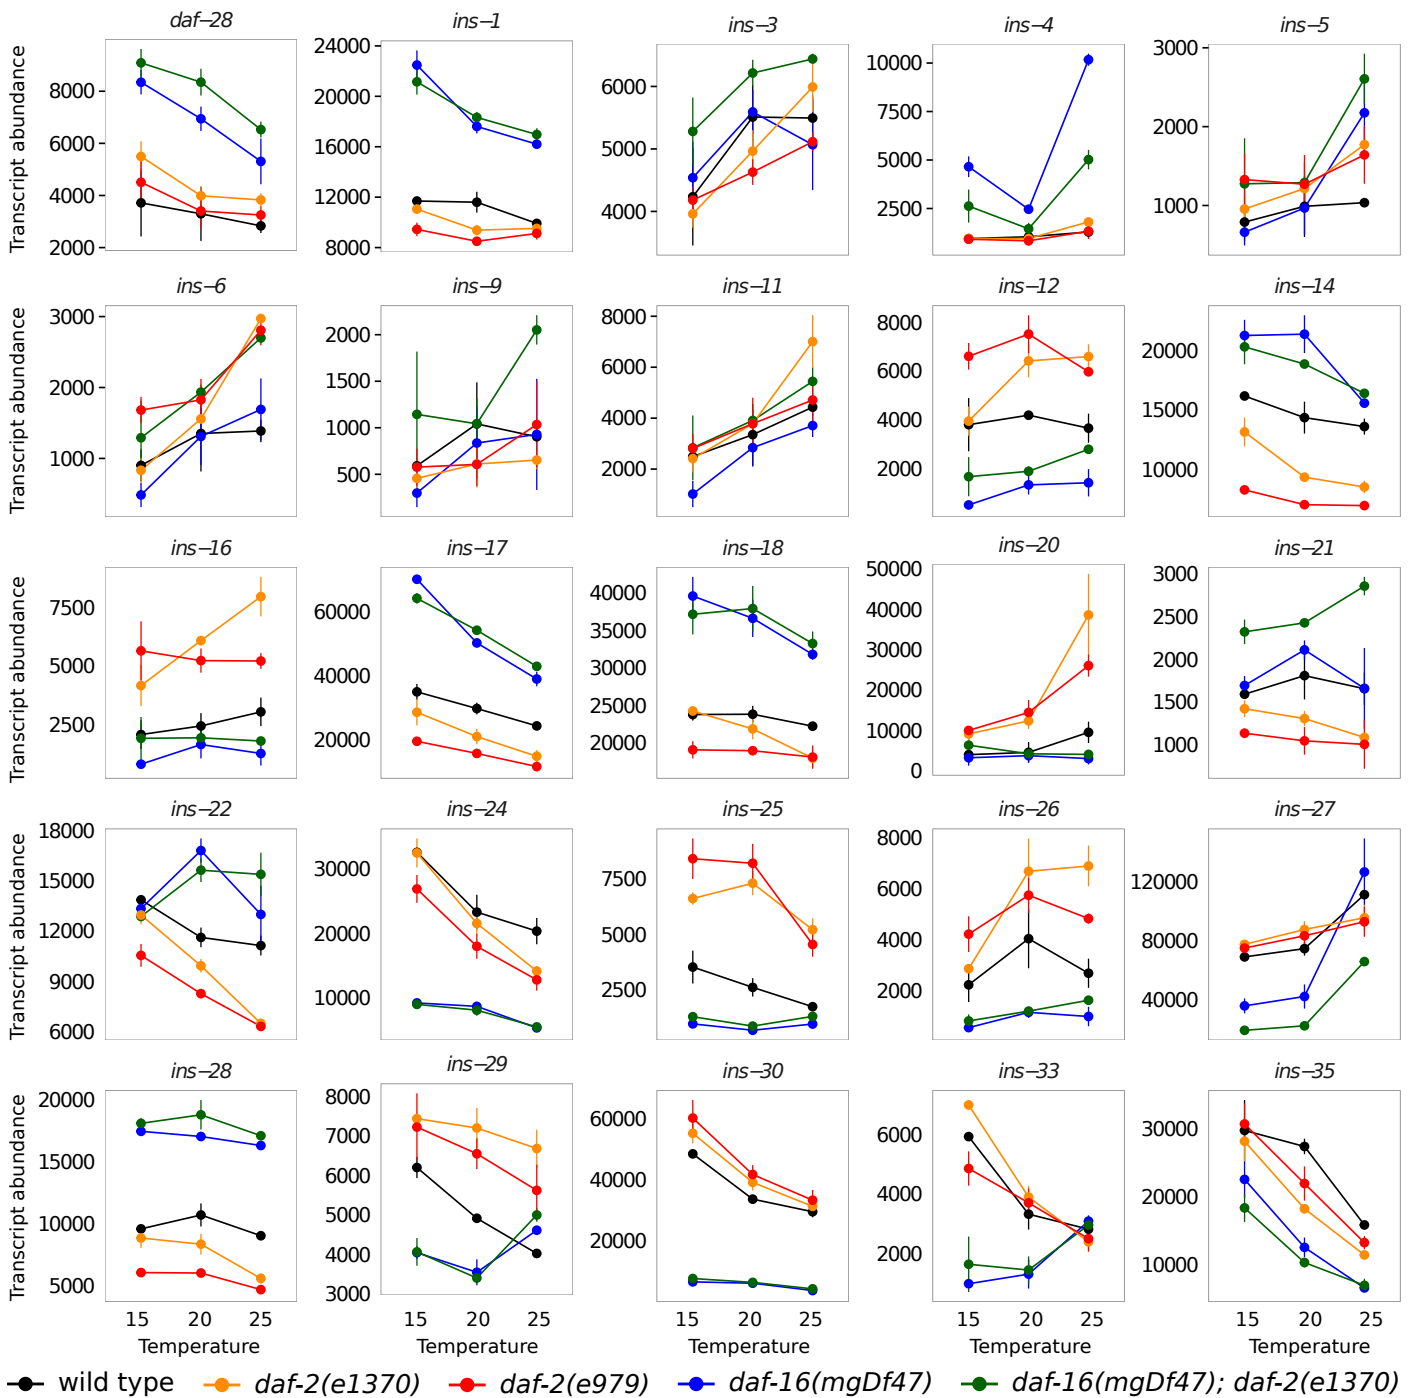

Table 1. Summary of genes regulated by *daf-16*/FoxO. The gene, whether it is activated or repressed by *daf-16*, putative function of the gene, and whether regulation is predicted to result in positive or negative feedback is presented. Four total tests for regulation were considered (during L1 starvation at three different temperatures and during recovery over time after feeding, comparing *daf-16(mgDf47)* to WT and also *daf-16(mgDf47); daf-2(e1370)* to *daf-2(e1370)*). Results are considered significant if the p-value is below 0.05 in any one test after correction for multiple testing. See supplementary information for complete statistical analysis. Insulin-like peptides are predicted to function as agonists or antagonists of *daf-2*/InsR based on published genetic or expression analysis (Chen et al. 2014 is cited separately for results based on genetic or expression analysis; all other citations are for genetic analysis), and positive or negative feedback is predicted based on putative function (agonist or antagonist) and whether the gene is positively or negatively regulated by *daf-16*.

| Gene                | Regulation by <i>daf-16</i> | Putative function                | Predicted feedback |
|---------------------|-----------------------------|----------------------------------|--------------------|
| <i>daf-2</i> /InsR  | repressed                   | insulin receptor                 | positive           |
| <i>age-1</i> /PI3K  | repressed                   | PI3K pathway                     | positive           |
| <i>pdk-1</i> /PDK   | activated                   | PI3K pathway                     | negative           |
| <i>akt-1</i> /Akt   | activated                   | PI3K pathway                     | negative           |
| <i>akt-2</i> /Akt   | activated                   | PI3K pathway                     | negative           |
| <i>skn-1</i> /Nrf   | repressed                   | insulin signaling effector       | NA                 |
| <i>daf-16</i> /FoxO | repressed                   | insulin signaling effector       | negative           |
| <i>sod-3</i> /SOD   | activated                   | known <i>daf-16</i> target       | NA                 |
| <i>daf-28</i>       | repressed                   | agonist <sup>a,b,c,i,j,k,l</sup> | positive           |
| <i>ins-1</i>        | repressed                   | antagonist <sup>b,d,i,j</sup>    | negative           |
| <i>ins-3</i>        | repressed                   | agonist <sup>e,i,j,l</sup>       | positive           |
| <i>ins-4</i>        | repressed                   | agonist <sup>c,i,j,k,l</sup>     | positive           |
| <i>ins-5</i>        | activated                   | agonist <sup>j,l</sup>           | negative           |
| <i>ins-6</i>        | activated                   | agonist <sup>b,c,i,j,k,l</sup>   | negative           |
| <i>ins-9</i>        | repressed                   | agonist <sup>k</sup>             | positive           |
| <i>ins-11</i>       | repressed                   | antagonist <sup>f,j,k</sup>      | negative           |
| <i>ins-12</i>       | activated                   | antagonist <sup>l</sup>          | positive           |
| <i>ins-14</i>       | repressed                   | agonist <sup>j</sup>             | positive           |
| <i>ins-16</i>       | activated                   | antagonist <sup>l</sup>          | positive           |
| <i>ins-17</i>       | repressed                   | antagonist <sup>g,l</sup>        | negative           |
| <i>ins-18</i>       | repressed                   | antagonist <sup>d,h,i,j,l</sup>  | negative           |
| <i>ins-20</i>       | activated                   | antagonist <sup>i,l</sup>        | positive           |
| <i>ins-21</i>       | repressed                   | agonist <sup>i,l</sup>           | positive           |
| <i>ins-22</i>       | repressed                   | agonist <sup>i,l</sup>           | positive           |
| <i>ins-24</i>       | activated                   | unknown                          | unknown            |
| <i>ins-25</i>       | activated                   | antagonist <sup>l</sup>          | positive           |
| <i>ins-26</i>       | activated                   | agonist <sup>i,l</sup>           | negative           |
| <i>ins-27</i>       | activated                   | agonist <sup>i,l</sup>           | negative           |
| <i>ins-28</i>       | repressed                   | agonist <sup>i,l</sup>           | positive           |
| <i>ins-29</i>       | activated                   | antagonist <sup>l</sup>          | positive           |
| <i>ins-30</i>       | activated                   | unknown                          | unknown            |
| <i>ins-33</i>       | activated                   | agonist <sup>e,j,l</sup>         | negative           |
| <i>ins-35</i>       | activated                   | agonist <sup>i,l</sup>           | negative           |



- <sup>a</sup> Patel et al. (2008).
- <sup>b</sup> Cornils et al. (2011).
- <sup>c</sup> Li et al. (2003).
- <sup>d</sup> Pierce et al. (2001).
- <sup>e</sup> Michaelson et al. (2010).
- <sup>f</sup> Kawano et al. (2006).
- <sup>g</sup> Matsunaga et al. (2012a).
- <sup>h</sup> Matsunaga et al. (2012b)
- <sup>i</sup> Hung et al. (2014).
- <sup>j</sup> Fernandes de Abreu et al. (2014).
- <sup>k</sup> Chen et al. (2014) - genetics.
- <sup>l</sup> Chen et al. (2014) - expression.

Table S1. Summary of insulin-like peptides whose expression is affected by temperature during L1 starvation. The gene, the nominal p-value for the effect of temperature after controlling for genotype (not corrected for multiple testing), and whether the gene's expression is positively or negatively correlated with temperature is presented. Only those genes with a p-value below 0.05 after correction for multiple testing are included.

| Gene          | p-value | Correlation with temperature |
|---------------|---------|------------------------------|
| <i>daf-28</i> | 2.2E-04 | negative                     |
| <i>ins-1</i>  | 6.3E-05 | negative                     |
| <i>ins-3</i>  | 4.0E-05 | positive                     |
| <i>ins-4</i>  | 6.8E-04 | positive                     |
| <i>ins-5</i>  | 6.3E-04 | positive                     |
| <i>ins-6</i>  | 1.9E-07 | positive                     |
| <i>ins-10</i> | 1.7E-05 | positive                     |
| <i>ins-11</i> | 8.6E-06 | positive                     |
| <i>ins-14</i> | 1.0E-05 | negative                     |
| <i>ins-17</i> | 1.6E-08 | negative                     |
| <i>ins-18</i> | 7.0E-04 | negative                     |
| <i>ins-20</i> | 2.2E-03 | positive                     |
| <i>ins-22</i> | 2.2E-03 | negative                     |
| <i>ins-24</i> | 6.6E-08 | negative                     |
| <i>ins-25</i> | 2.3E-03 | negative                     |
| <i>ins-26</i> | 2.3E-03 | positive                     |
| <i>ins-27</i> | 1.3E-05 | positive                     |
| <i>ins-28</i> | 6.1E-05 | negative                     |
| <i>ins-30</i> | 1.0E-06 | negative                     |
| <i>ins-33</i> | 7.1E-03 | negative                     |
| <i>ins-35</i> | 8.8E-12 | negative                     |
| <i>sod-3</i>  | 3.2E-03 | positive                     |
